# Supplementary material for: Multi-potential-step chronocoulospectrometry for electrocatalytic water oxidation by a mononuclear ruthenium aquo complex immobilized on a mesoporous ITO electrode
Source: Royal Society of Chemistry journal article supplement (doi:10.1039/c9dt04442f), 2019-12-23
Supplement: c9dt04442f1.pdf [file c9dt04442f1.pdf]

## Supporting Information

### **Multi-Potential-Step Chronocoulopectrometry for Electrocatalytic Water Oxidation by a Mononuclear Ruthenium Aqua Complex Immobilized on a Mesoporous ITO Electrode**

Yuta Tsubonouchi, Junichiro Honta, Taisei Sato, Eman A. Mohamed, Zaki. N. Zahran, Kenji Saito, Tatsuto Yui, Masayuki Yagi\*

Department of Materials Science and Technology, Faculty of Engineering, Niigata University, 8050 Ikarashi-2, Niigata 950-2181, Japan.

#### **Contents.**

#### **Calculation of TOF**

**Figure S1.**  $^1\text{H}$ -NMR spectrum of  $[\text{Ru}(\text{C}_8\text{Otpy})(\text{H}_2\text{dcbpy})\text{Cl}]\text{Cl}$ .

**Figure S2.** UV-Vis spectrum of  $[\text{Ru}(\text{C}_8\text{Otpy})(\text{H}_2\text{dcbpy})\text{Cl}]\text{Cl}$ .

**Figure S3.**  $^1\text{H}$ -NMR spectrum of  $[\text{Ru}(\text{C}_8\text{Otpy})(\text{H}_2\text{dcbpy})(\text{OH}_2)](\text{NO}_3)_2$ .

**Figure S4.** UV-Vis spectrum of  $[\text{Ru}(\text{C}_8\text{Otpy})(\text{H}_2\text{dcbpy})(\text{OH}_2)](\text{NO}_3)_2$ .

**Figure S5.** XRD patterns of a meso-ITO electrode

**Figure S6.** FE-SEM images of a meso-ITO electrode.

**Figure S7.** UV-Vis spectrum of  $[\text{Ru}(\text{C}_8\text{Otpy})(\text{dcbpy})(\text{OH})]^-$  in 2 M KOH.

### Calculation of TOF

The averaged TOF value during 100 s was calculated from the MPSCCS measurements at the applied potential of 1.5 V vs. Ag/AgCl (Figure 5) according to the following equation:

$$TOF = \frac{Q_{cat} - Q_{blank}}{4 \times F \times \Gamma_{cov} \times t}$$

where,  $Q_{cat}$  [mol/cm<sup>2</sup>] is the charge amount passed during 100 s electrolysis,  $Q_{blank}$  [mol/cm<sup>2</sup>] is the charge amount using a blank meso-ITO electrode,  $\Gamma_{cov}$  [mol/cm<sup>2</sup>] is coverage of **RuOH** on the electrode, F is Faraday constant and  $t$  [s] is electrolysis time (100 s).

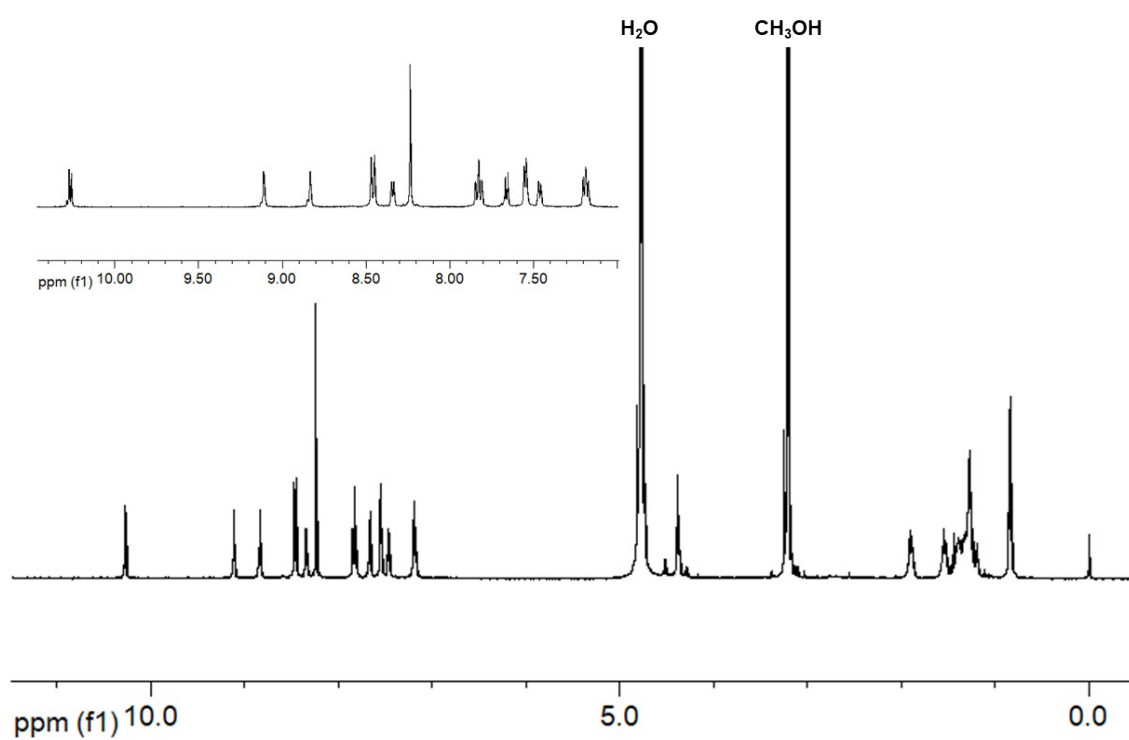

**Figure S1.**  $^1\text{H}$ -NMR spectrum of  $[\text{Ru}(\text{C}_8\text{Otpy})(\text{H}_2\text{dcbpy})\text{Cl}]\text{Cl}$  in  $\text{CD}_3\text{OD}$ .

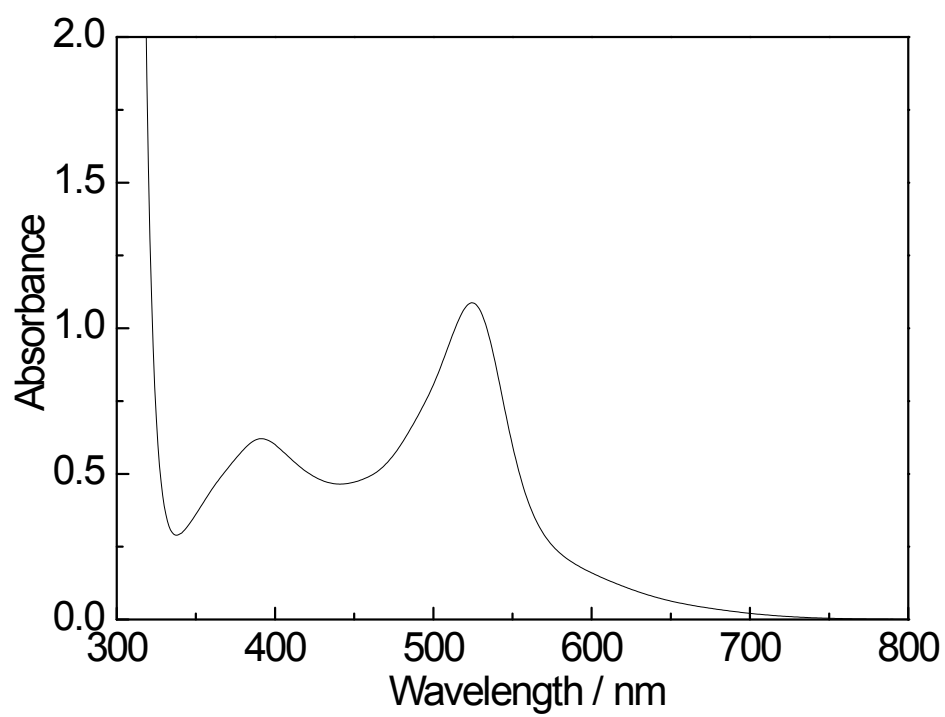

**Figure S2.** UV-Vis spectrum of  $[\text{Ru}(\text{C}_8\text{Otpy})(\text{H}_2\text{dcbpy})\text{Cl}]\text{Cl}$  (0.08 mM) in  $\text{CH}_3\text{OH}$ .

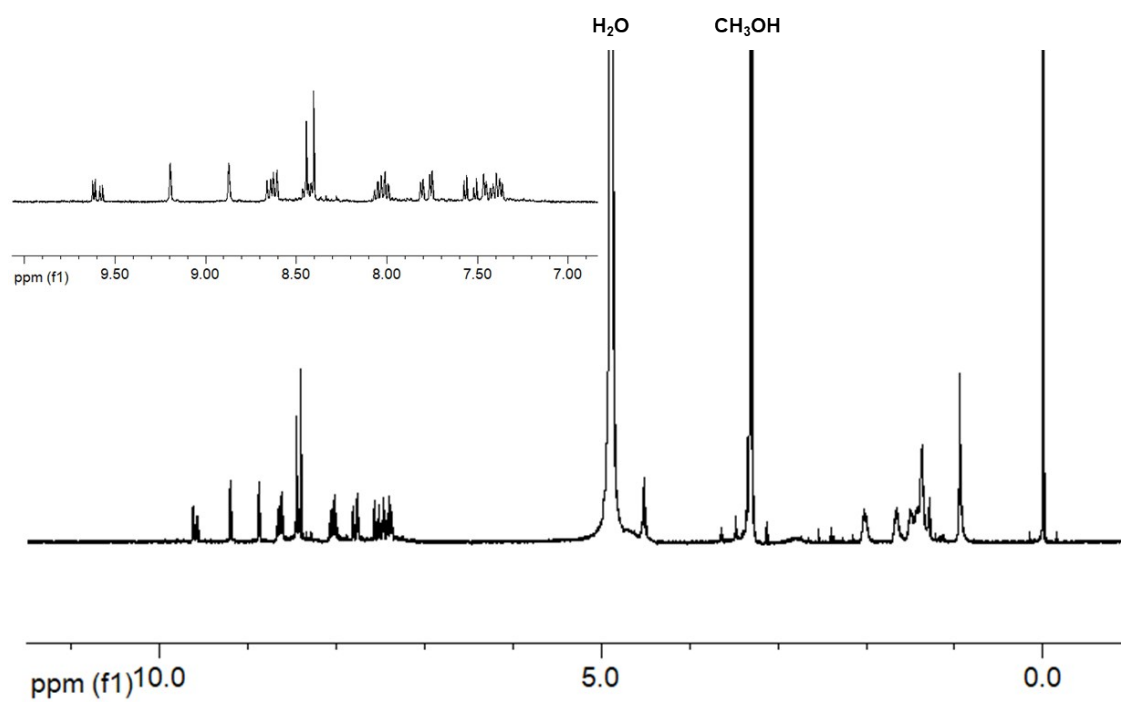

**Figure S3.**  $^1\text{H}$ -NMR spectrum of  $[\text{Ru}(\text{C}_8\text{Otpy})(\text{H}_2\text{dcbpy})(\text{OH}_2)](\text{NO}_3)_2$  in  $\text{CD}_3\text{OD}$ .

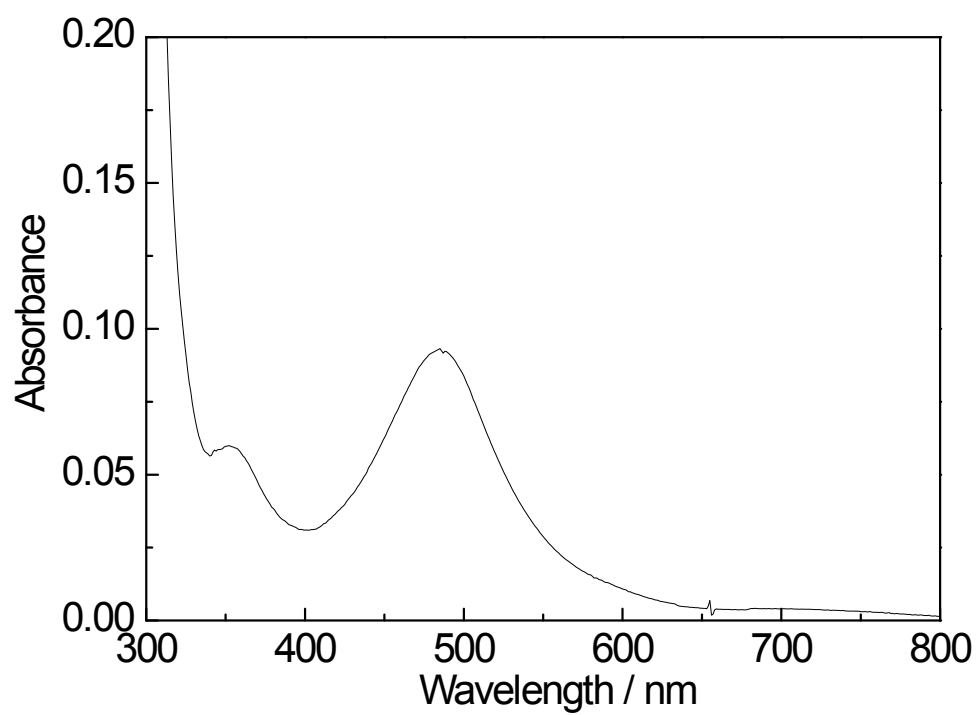

**Figure S4.** UV-Vis spectrum of [Ru(C<sub>8</sub>Otpy)(H<sub>2</sub>dcbpy)(OH<sub>2</sub>)](NO<sub>3</sub>)<sub>2</sub> (0.08 mM) in CH<sub>3</sub>OH.

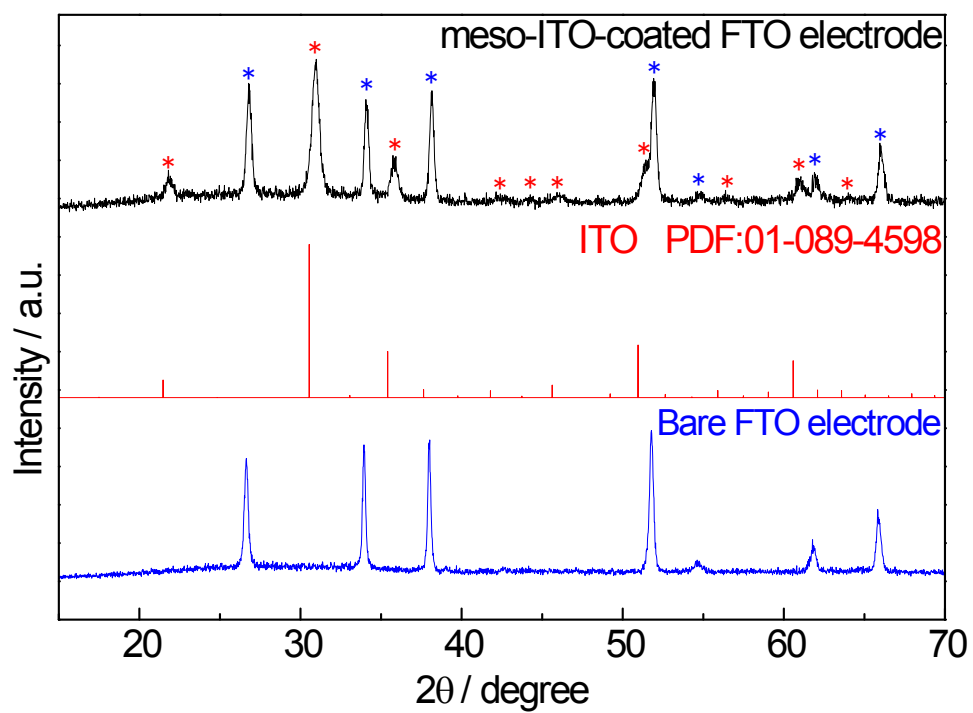

**Figure S5.** XRD patterns of a mesoporous ITO electrode. The peaks for ITO and FTO were marked by the blue and red asterisks, respectively.

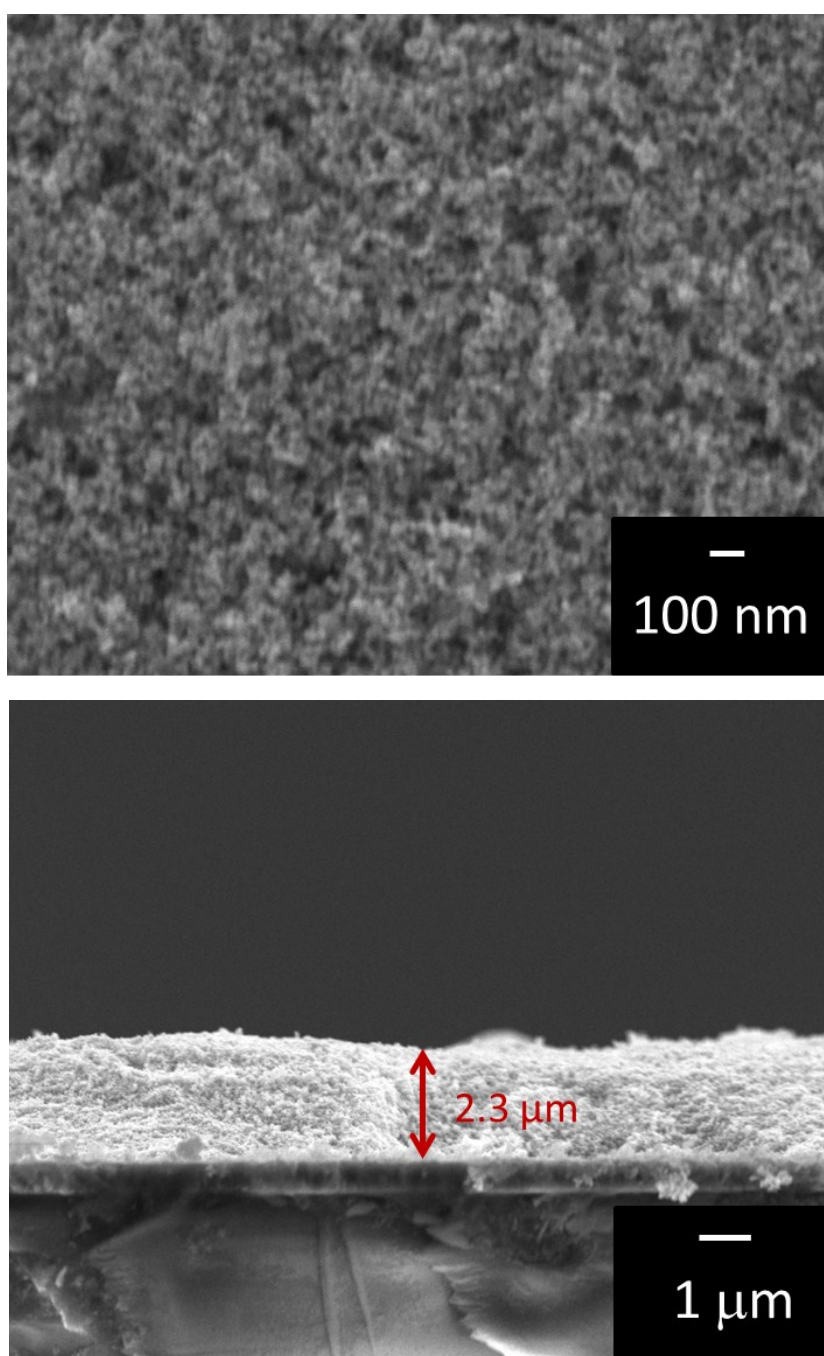

**Figure S6.** FE-SEM images of the surface (upper) and cross-section (lower) of a mesoporous ITO electrode.



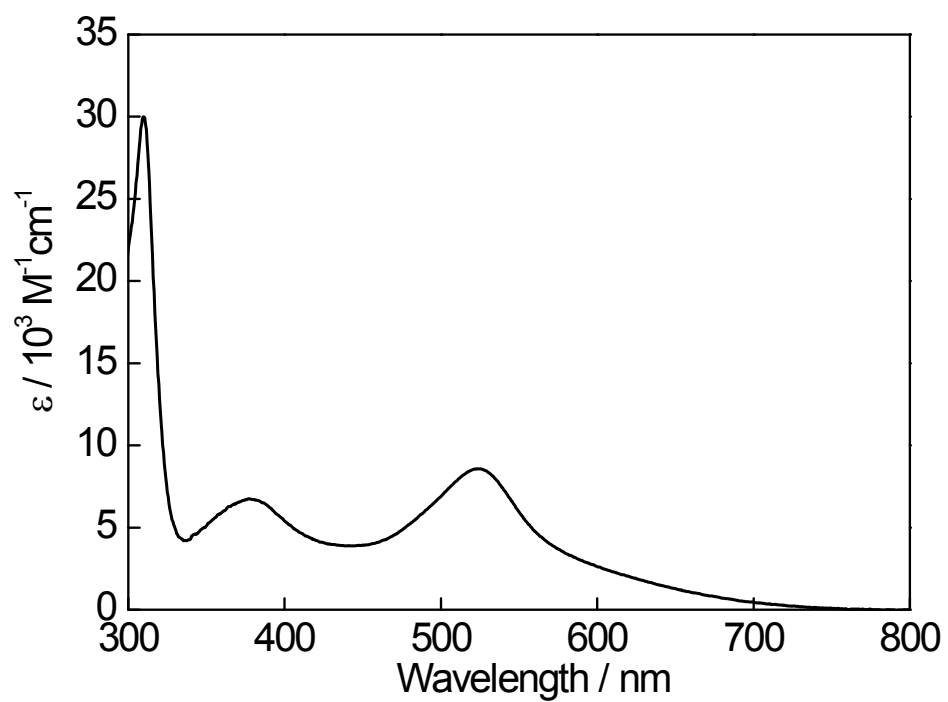

**Figure S7.** UV-Vis spectrum of  $[\text{Ru}(\text{C}_8\text{Otpy})(\text{dcbpy})(\text{OH})]^-$  (0.118 mM) in 2 M KOH.
